# Supplementary material for: Primary outcomes reporting in trials of paediatric type 1 diabetes mellitus: a systematic review
Source: PubMed Central journal article supplement — BMJ Open. 2017 Dec 19;7(12):e014610. doi: 10.1136/bmjopen-2016-014610 (PMC5743897; doi:10.1136/bmjopen-2016-014610), 2017-12-19
Supplement: bmjopen-2016-014610supp002.pdf [file bmjopen-2016-014610supp002.pdf]

Medline search strategy:

1. randomized controlled trial/
2. clinical trial.pt.
3. randomi?ed.ti,ab.
4. placebo.ti,ab.
5. dt.fs.
6. randomly.ti,ab.
7. trial.ti,ab.
8. groups.ti,ab.
9. or/1-8
10. Animals/
11. Humans/
12. 10 not (10 and 11)
13. 9 not 12
14. exp Diabetes Mellitus/
15. exp Diabetes Mellitus, Type 2/
16. exp Diabetes Mellitus, Type 1/
17. type 1 diabetes.mp.
18. type 2 diabetes.mp.
19. diabet\*.mp.
20. diabet\* syndrome\*.mp.
21. childhood-onset diabetes.mp.
22. Juvenile onset diabetes.mp.
23. (juvenile adj2 diabet\*).mp.
24. Insulin dependent diabet\*.mp.

25. juvenile diabetes.mp.

26. IDDM.mp.

27. or/14-26

28. 13 and 27

29. limit 28 to "all child (0 to 18 years)"

30. limit 29 to english language

31. limit 30 to yr="2001 - 2017"
